# Supplementary material for: Rescued chlorhexidine activity by resveratrol against carbapenem-resistant Acinetobacter baumannii via down-regulation of AdeB efflux pump
Source: PubMed Central journal article supplement (PMC7710055; doi:10.1371/journal.pone.0243082), 2020-12-02
Supplement: pone.0243082.s002.pdf [file pone.0243082.s002.pdf]

**S2 Table. Characteristics of *A. baumannii* clinical isolates.**

| Strain | Carbapenemase gene                                          | Aminoglycoside-modifying enzyme gene | MIC (mg/L) |               |          |             |
|--------|-------------------------------------------------------------|--------------------------------------|------------|---------------|----------|-------------|
|        |                                                             |                                      | Imipenem   | Chlorhexidine | Amikacin | Resveratrol |
| AC151  | <i>bla</i> <sub>OXA-51</sub> + <i>bla</i> <sub>OXA-23</sub> | -                                    | 64         | 32            | 2        | >512        |
| AC152  | <i>bla</i> <sub>OXA-51</sub> + <i>bla</i> <sub>OXA-23</sub> | <i>armA</i>                          | 128        | 16            | >256     | >512        |
| AC153  | <i>bla</i> <sub>OXA-51</sub> + <i>bla</i> <sub>OXA-23</sub> | <i>armA</i>                          | 32         | 32            | >256     | >512        |
| AC154  | <i>bla</i> <sub>OXA-51</sub> + <i>bla</i> <sub>OXA-23</sub> | <i>armA</i>                          | 128        | 32            | >256     | >512        |
| AC155  | <i>bla</i> <sub>OXA-51</sub> + <i>bla</i> <sub>OXA-23</sub> | <i>armA</i>                          | 128        | 32            | >256     | >512        |
| AC156  | <i>bla</i> <sub>OXA-51</sub> + <i>bla</i> <sub>OXA-23</sub> | <i>armA</i>                          | 128        | 32            | >256     | >512        |
| AC157  | <i>bla</i> <sub>OXA-51</sub> + <i>bla</i> <sub>OXA-23</sub> | <i>armA</i>                          | 128        | 32            | >256     | >512        |
| AC158  | <i>bla</i> <sub>OXA-51</sub> + <i>bla</i> <sub>OXA-23</sub> | -                                    | 64         | 16            | 2        | >512        |
| AC159  | <i>bla</i> <sub>OXA-51</sub> + <i>bla</i> <sub>OXA-23</sub> | <i>armA</i>                          | 128        | 32            | >256     | >512        |
| AC160  | <i>bla</i> <sub>OXA-51</sub> + <i>bla</i> <sub>OXA-23</sub> | <i>armA</i>                          | 64         | 32            | >256     | >512        |
| L25    | <i>bla</i> <sub>OXA-51</sub> + <i>bla</i> <sub>OXA-23</sub> | -                                    | 32         | 32            | 0.5      | >512        |
| L26    | <i>bla</i> <sub>OXA-51</sub> + <i>bla</i> <sub>OXA-23</sub> | <i>armA</i>                          | 64         | 32            | >256     | >512        |
| L27    | <i>bla</i> <sub>OXA-51</sub> + <i>bla</i> <sub>OXA-23</sub> | <i>armA</i>                          | 64         | 32            | >256     | >512        |
| L28    | <i>bla</i> <sub>OXA-51</sub> + <i>bla</i> <sub>OXA-23</sub> | <i>armA</i>                          | 64         | 32            | >256     | >512        |
| L29    | <i>bla</i> <sub>OXA-51</sub> + <i>bla</i> <sub>OXA-23</sub> | <i>armA</i>                          | 64         | 32            | >256     | >512        |
| L12    | <i>bla</i> <sub>OXA-51</sub> + <i>bla</i> <sub>OXA-23</sub> | -                                    | 32         | 32            | 16       | >512        |
| L14    | <i>bla</i> <sub>OXA-51</sub> + <i>bla</i> <sub>OXA-23</sub> | -                                    | 32         | 32            | 0.5      | >512        |
| L20    | <i>bla</i> <sub>OXA-51</sub> + <i>bla</i> <sub>OXA-23</sub> | <i>armA</i>                          | 128        | 32            | >256     | >512        |
| L21    | <i>bla</i> <sub>OXA-51</sub> + <i>bla</i> <sub>OXA-23</sub> | <i>armA</i>                          | 128        | 32            | >256     | >512        |
| L23    | <i>bla</i> <sub>OXA-51</sub> + <i>bla</i> <sub>OXA-23</sub> | <i>armA</i>                          | 128        | 32            | >256     | >512        |
